# Supplementary material
Source: publisher figshare collection journal article supplement (https://gsajournals.figshare.com/ndownloader/files/25333772)
Supplement: Supplementary file 1 [file 25333772]

## Sheet: Dataset S6
Potential Novel Genes
Gene ID	Gene name	Chromosome	Strand	Start codon	Coordinates	Gene nucleotide sequence	Gene amino acid sequence	# amino acids	ORF length (bp)	Transcript length (bp)
MSTRG.1	MSTRG.1	Ca22chr1A_C_albicans_SC5314	-	ATG	1428-1535	ATGTGCTGGTCAAAAAATATCACTTTTCTTCAACGACAACAAATCAATCAATTAGATGAGATGAAGAACGCAGTTATAACTGTTACAATAAGAAGTTTGAAATCTGGA	MCWSKNITFLQRQQINQLDEMKNAVITVTIRSLKSG	36	108	272
MSTRG.10192	MSTRG.10192	Ca22chrRB_C_albicans_SC5314	-	ATT	1371227-1371340	ATTTCAGTTTACCTTGTTTTTTTTTTCAACAACTACAACTACTACTCAACTTATCAATTTCAACTTTCATTAACATTAACATCATCCTGTCAATTCAAAGACTTCCAGAAACTT	ISVYLVFFFNNYNYYSTYQFQLSLTLTSSCQFKDFQKL	38	114	208
MSTRG.1494	MSTRG.1494	Ca22chr1B_C_albicans_SC5314	-	AAG	512208-512285	AAGTCCAAAAGATATCTATTTAAAACAAACAGTATTTCTTGTATTTATCAAATTAGCAAAGAATCTAGCATTCATATA	KSKRYLFKTNSISCIYQISKESSIHI	26	78	232
MSTRG.182	MSTRG.182	Ca22chr1A_C_albicans_SC5314	+	GTG	404654-404773	GTGGCTTATTTAAGTATCAGACAACAGATACATGGTTTCCAAGTGGTCTCATTTTTGGTTTACTGGAGTCTGCATTCCCCACAAAAGTACCTTTCGAAACTAATTAATGTAGCTTCTATT	VAYLSIRQQIHGFQVVSFLVYWSLHSPQKYLSKLINVASI	40	120	533
MSTRG.1841	MSTRG.1841	Ca22chr1B_C_albicans_SC5314	-	ACG	1318669-1318776	ACGTTTATTTCGGATAACCAATTGTTATTTTTCATTTTCATTTTTTTTTTTCCGTTTTTTTGCTTGTTTGTGTGGATTTATATCATTGTCCAAAAGTTTAAACTTGGT	TFISDNQLLFFIFIFFFPFFCLFVWIYIIVQKFKLG	36	108	214
MSTRG.1980	MSTRG.1980	Ca22chr1B_C_albicans_SC5314	+	ATT	1673400-1673477	ATTCATAATACATTACTTCAAGACAATACAACCTCCCCATTGATATATATATATGAGTTATTATCATCATTAACAGAT	IHNTLLQDNTTSPLIYIYELLSSLTD	26	78	199
MSTRG.2	MSTRG.2	Ca22chr1A_C_albicans_SC5314	+	ATT	1910-2239	ATTTATCAACCACCAAACACAGCAGCGCAACAGCTTCCACAGTTCTTGTTGCCACGATTTCGGCAACTACGATTGACTAKTGATTTTTCAGCCAGCAAACACAACTGCTTTGACAACAGCAAATACAACGAGATACACAACATGCATCGACAACTCCCTCCACAGTTCGTGTTGAATTTCCCATTGCCACTATGTTCAATTTTCGACACTGYCATTGACAACGAGATACACAACTGCTTCCACATTTCGTGTTGCATTTCCCACTGCCATCAACTAGCAAGCACAACATGCATCGACAACACCCTCCACAGTTCGTGTTGCATTTCCCAT	IYQPPNTAAQQLPQFLLPRFRQLRLTDFSASKHNCFDNSKYNEIHNMHRQLPPQFVLNFPLPLCSIFDTIDNEIHNCFHISCCISHCHQLASTTCIDNTLHSSCCISH	110	330	918
MSTRG.2209	MSTRG.2209	Ca22chr1B_C_albicans_SC5314	-	ATC	2326605-2326745	ATCAGATTTAACTACAGAATAGACTTTTTCATGGCATGTCATTGTCGGAGATTTGCCGCTGAGAGATATATCATTAGCCAACGTTCGCTTAATCTACTTTTGGCTAACAGTTCTGTTAGGTTTAGAGATAAAGAGAATGCC	IRFNYRIDFFMACHCRRFAAERYIISQRSLNLLLANSSVRFRDKENA	47	141	404
MSTRG.2510	MSTRG.2510	Ca22chr2A_C_albicans_SC5314	+	ATT	29-112	ATTACTATTAAGAATTCGCTATTGTTTTTTACTGATTGCTTTACATTTTATTTACTTGATGAGGAGTTTATAGTATCCTTCTTT	ITIKNSLLFFTDCFTFYLLDEEFIVSFF	28	84	267
MSTRG.2511	MSTRG.2511	Ca22chr2A_C_albicans_SC5314	-	CTG	266-526	CTGAGTAATTGGKAATGTGCTTTGAGAGAAGTCYACAGTGGGGACATGGGAATRAGGTGTTGGAAATTCACGGATGGCGAAACRGTTGCTGGCCAAGCTAGTCAGGGATTCGCGGGAAATTATTGCAGCTCGGGTATGATTTTTAAGGGATTGGAAACTACTCTGAGAGACATGGAAGTCGACGTGGCAATGGAAGTYGCAAGGGAATTGGGAAGTACTGAGAGAATGYACAGCCAAGCCATCTTTTTCTGCTCGCGGGTT	LSNWCALREVSGDMGRCWKFTDGEVAGQASQGFAGNYCSSGMIFKGLETTLRDMEVDVAMEARELGSTERMSQAIFFCSRV	87	261	728
MSTRG.2713	MSTRG.2713	Ca22chr2A_C_albicans_SC5314	+	GTG	450787-450921	GTGAGGTTTCTTTTTTTATATACACGTTTTGTAACACGGCATGCTAGGTATATACTGCTACTTATGTTATATCTGTCTTTGCTAAAGTATAATAAGTATAGTTCACTTGTTAGATATTTCCGGACTTTAAAGATT	VRFLFLYTRFVTRHARYILLLMLYLSLLKYNKYSSLVRYFRTLKI	45	135	226
MSTRG.3162	MSTRG.3162	Ca22chr2A_C_albicans_SC5314	-	ATG	1498147-1498239	ATGACCTTCCAAGTTTTATACTTACATGATGAAATCTCGCGTTATATTCAACGATTCGGCCCTTCTGTTGACTGGTTTTCTTTTATGAGAAGT	MTFQVLYLHDEISRYIQRFGPSVDWFSFMRS	31	93	378
MSTRG.3336	MSTRG.3336	Ca22chr2A_C_albicans_SC5314	-	ATT	1886362-1886389,1886495-1886520,1886620-1886739	ATTTTATCGACAGCATCCTTTTCTTTGGCCACATATCCAAGCGATATACTGGCCAAAGCGAAGTCCTTTTATAAAGCAATGCTACCAAATGTAACAGTTCGAGGTCAGAAGATTAAGCGGCTCATAACCTGTTGGAATTTAAATTCCGTTGGGCTCCATGTTAGAATAGATTAT	ILSTASFSLATYPSDILAKAKSFYKAMLPNVTVRGQKIKRLITCWNLNSVGLHVRIDY	58	174	389
MSTRG.3355	MSTRG.3355	Ca22chr2A_C_albicans_SC5314	-	AAG	1915071-1915136	AAGAGCAAAGAAAGATTCCACTTTTACAAAAACATGAATTGTGAGTTGTGCTCTCGTATCCACTTT	KSKERFHFYKNMNCELCSRIHF	22	66	217
MSTRG.3486	MSTRG.3486	Ca22chr2A_C_albicans_SC5314	-	ATT	2229460-2229579	ATTAGAGTGCGGTTTAAATTTACTGGTAATTGTAATTTAAGTTCAGGGAGTTGTTCAAACTCAGAGTGGCTCATTTGTGAAGAGAGTTCCAAAGTAGTTGTGTTGTTGTTAAATCTGTGT	IRVRFKFTGNCNLSSGSCSNSEWLICEESSKVVVLLLNLC	40	120	561
MSTRG.3487	MSTRG.3487	Ca22chr2A_C_albicans_SC5314	+	ATG	2231614-2231739	ATGGATAGTGAAGAAAGGGAGGTGGGAGTGAACAGCGTTGGAGATGGACAAGACAGGGAGTGGGTGGAAGAAAGTCAAAGGGATTGGAAATGTAGTCTTAAACACGTGGAAGCTGCACTGGATCGG	MDSEEREVGVNSVGDGQDREWVEESQRDWKCSLKHVEAALDR	42	126	260
MSTRG.4003	MSTRG.4003	Ca22chr2B_C_albicans_SC5314	-	AGG	2063658-2063762	AGGGGAAAACCACAACTCTTGCCAATGCTTTTTTTTAAAAGATTTGATGGGAAACATTCTTTAGGGCCAATGGGAAATGTTTCTAATGGACCGAAGTTCTTATTT	RGKPQLLPMLFFKRFDGKHSLGPMGNVSNGPKFLF	35	105	237
MSTRG.4032	MSTRG.4032	Ca22chr3A_C_albicans_SC5314	+	GTG	2923-3318	GTGTTGCCACAATTTCTACGACTGCCATTGATCGCTCATTCTCCAACCAGCAAACAATGCGAGATACACAACTGCCATACACAGTCAGTGTTGTTTTTCCTATTCAATTTGCTCGGCTCGACCACCTATCAGTGTGCATGTTGCATTTCCCATTGCCACTATGTTCAATTTTCGACACTGCCATTGACAACGAGATACACAACTGTTTCCACATTTCATGTTGCATTTCCCACTGCCATTGAGTTACTACAACTGCCATTAGTTGACAACGACACACCAGCTTGCACAACTCTCCAGAATATTTTCCACCACCATCAACTACTGAATCTACAAGTTGTTCTATCGTCCCTTCTCCAACYAGCAARCACAACGAGATACWTGTCTGGGCATTTACAA	VLPQFLRLPLIAHSPTSKQCEIHNCHTQSVLFFLFNLLGSTTYQCACCISHCHYVQFSTLPLTTRYTTVSTFHVAFPTAIELLQLPLVDNDTPACTTLQNIFHHHQLLNLQVVLSSLLQATTRYSGHLQ	132	396	1649
MSTRG.4628	MSTRG.4628	Ca22chr3A_C_albicans_SC5314	-	ATT	1480216-1480332	ATTTTCTTCTTATGTCTAGATGTTGATAAAAATTGCCACCGAGTTTGTGAAACCCTGGTGGAAGTACTATATATTCGAGTAAGCCCTAATGGGGTTTGGAATGCTGTTAAATTTTTA	IFFLCLDVDKNCHRVCETLVEVLYIRVSPNGVWNAVKFL	39	117	376
MSTRG.476	MSTRG.476	Ca22chr1A_C_albicans_SC5314	+	ATA	1096386-1096535	ATAGTGTTTCTTTCTTTTTTTAATAAAAAGGAAGGGAGAAATGATATTTGGACCTTTAATTTTTCAAATATGGCTTTTACTCATGGGTTATACATTTTTTATGAGAAAGTATTTCTAATTTGTAGTAAATTTTTAATGTTTTGGGTTGAT	IVFLSFFNKKEGRNDIWTFNFSNMAFTHGLYIFYEKVFLICSKFLMFWVD	50	150	343
MSTRG.4768	MSTRG.4768	Ca22chr3A_C_albicans_SC5314	-	ATG	1796906-1797058	ATGCCCTATTGCTTCCAACTGCTGTTCAGCCAGCAATCACAATTCATGCTGCAACAATTTCTACAACTGCCATTGACTATTGAATTTTCAACCAGCAAACACAAATCATTTCCCACTAGTTGTTCAWCCTGCAAATTCACCATATTTGACYTC	MPYCFQLLFSQQSQFMLQQFLQLPLTIEFSTSKHKSFPTSCSCKFTIFD	51	153	712
MSTRG.509	MSTRG.509	Ca22chr1A_C_albicans_SC5314	-	TTG	1158446-1158565	TTGTTAATAAAAGAAAAGAAAGAACAAATAGTAAAAGATTTAGTTAAAATCTGGAGCAGAAGGGTAAATATATATACTTGTGTGTATGTGTATGTGTATAAAAGATCAGAGATTAATAAC	LLIKEKKEQIVKDLVKIWSRRVNIYTCVYVYVYKRSEINN	40	120	236
MSTRG.5225	MSTRG.5225	Ca22chr4A_C_albicans_SC5314	-	ATG	83783-83872	ATGATGGTCGGTAGAATAAGATTTTCAGATCTGACTGATTCCATTTTACGTATTAACTTCAATAGGACGGCATTCAGCAATGACAAAAAT	MMVGRIRFSDLTDSILRINFNRTAFSNDKN	30	90	326
MSTRG.5506	MSTRG.5506	Ca22chr4A_C_albicans_SC5314	+	AAG	781769-781852	AAGATATCCCTTAGCTCAAAAGGATATTTTTCTTTACGGTATACGATTATGTTTAATATAAGTATTTTTTTATACATAACAGTC	KISLSSKGYFSLRYTIMFNISIFLYITV	28	84	407
MSTRG.553	MSTRG.553	Ca22chr1A_C_albicans_SC5314	+	TTG	1249911-1250006	TTGTTTAATTTTGGTTTTGAAAAAATTTTTAAATTTCTAAATTTCCTTAAATTGAAAGACTTAGTTAAAGTTAGTTTTATAAAGGGGGAGGTTATT	LFNFGFEKIFKFLNFLKLKDLVKVSFIKGEVI	32	96	406
MSTRG.553	MSTRG.553	Ca22chr1A_C_albicans_SC5314	+	TTG	1249911-1250006	TTGTTTAATTTTGGTTTTGAAAAAATTTTTAAATTTCTAAATTTCCTTAAATTGAAAGACTTAGTTAAAGTTAGTTTTATAAAGGGGGAGGTTATT	LFNFGFEKIFKFLNFLKLKDLVKVSFIKGEVI	32	96	406
MSTRG.5848	MSTRG.5848	Ca22chr4A_C_albicans_SC5314	+	AAG	1602417-1602632	AAGTCGACGTGGCAATGGAAGTRGCAAGGGAATTGGGAAGTACTGAGAGAATGRACAGCCAAGTTATTGGAAGTGGGAGTTGGATTTGGGAAAGAAAATCAGAGAATGAAAAATCATGGAAATTATTTTGAAAAAACCCTGGCCAAGTTGATTAGGGTGACAGYAGCAATGGAGATCAAGTTCAAACTCAAGGGAAAGTTACTGCAATGGCAGGAA	KSTWQWKQGNWEVLRETAKLLEVGVGFGKENQRMKNHGNYFEKTLAKLIRVTAMEIKFKLKGKLLQWQE	72	216	396
MSTRG.6	MSTRG.6	Ca22chr1A_C_albicans_SC5314	-	TTG	4823-4999	TTGAAACTCAATGGAATCAGCACTGGAAATTCACGGATGGCGAAACTGTTGCTGGCKAAGCTAGTCAGGGATTTGTGGAAAATGGAGTTTAAGGACATGGAAGTGAACGTTGGATTGGAGATGGATTTGGGAAAGAAAAATCATGGAAACTATTTTGAAACAACCGCGGCCAGAAAA	LKLNGISTGNSRMAKLLLKLVRDLWKMEFKDMEVNVGLEMDLGKKNHGNYFETTAARK	59	177	612
MSTRG.6460	MSTRG.6460	Ca22chr4B_C_albicans_SC5314	+	ATC	1456662-1456826	ATCTTACTTTATTTAATTAGTGGAACCTTAAAATTCTTATCGACTGTTTCAAAATATTCATTCCGTGTTTACATACTTCATTCCGAAAGTATTAGATCTAGACTCGTTTATAATAGCAACAACAACAATAGCAACGATTCAACTGAAACAACAATATTAATTTAT	ILLYLISGTLKFLSTVSKYSFRVYILHSESIRSRLVYNSNNNNSNDSTETTILIY	55	165	242
MSTRG.6630	MSTRG.6630	Ca22chr5A_C_albicans_SC5314	-	AAG	256393-256452	AAGACTTTATTATATTCCGACAATGATAACCACTCACTTCTTGAATCCCATTCAATAACA	KTLLYSDNDNHSLLESHSIT	20	60	216
MSTRG.6996	MSTRG.6996	Ca22chr5A_C_albicans_SC5314	+	AAG	1118171-1118374	AAGTATTCAACAAGATATTACTCCCATAACAGTACATACAAGGATATCCTATTCATTGATACCTCACAGAGATCAAAATCTTTCAGAATATCAAACATAAAAGAAAGTACGGATCATAGTATATCGTTTTTTTGTAACATCAGTCTAATCGTATCGTTCCAATCTTGTGTGTGTAAATACCAATTTGAGAATCATTCAATTGTC	KYSTRYYSHNSTYKDILFIDTSQRSKSFRISNIKESTDHSISFFCNISLIVSFQSCVCKYQFENHSIV	68	204	319
MSTRG.7036	MSTRG.7036	Ca22chr5A_C_albicans_SC5314	+	AAG	1181024-1181075,1181256-1181350	AAGAGTGTGAAGACTTTACTTCCCACTAAATGGCAAACCAGTAAAATAATACAGCTATTACAGACAGATTTGGAAGAGAAACAGCGTATTCAAGGACGGTGGGATACTAGTAGCGAGGCCAAGAAGCGACATCCAACGACTATAAAT	KSVKTLLPTKWQTSKIIQLLQTDLEEKQRIQGRWDTSSEAKKRHPTTIN	49	147	361
MSTRG.7517	MSTRG.7517	Ca22chr6A_C_albicans_SC5314	+	ATT	223825-223911	ATTCGTTTTTTTTTTTTTTTGATCTGCTTTCAACTTTCAATTACATCAGGAGCTTTCCATTCATTCATTCATTCGTTTTTTTTTTGT	IRFFFFLICFQLSITSGAFHSFIHSFFFC	29	87	17
MSTRG.7608	MSTRG.7608	Ca22chr6A_C_albicans_SC5314	-	AGG	435556-435729	AGGGTAAAACTCTGTATTGAAGTAAATTTTGAATTTGGGAATGGTAATAAATTTGTTCATTGGTTTGTAATTAATGATCATGCGGGACCAATTTTGTCTGAGTATGAATCTACTATTGAAGATTTCTACTCAACTACTAACTTCACGTTTATTTATACTAGACTTAGTGGCTCT	RVKLCIEVNFEFGNGNKFVHWFVINDHAGPILSEYESTIEDFYSTTNFTFIYTRLSGS	58	174	315
MSTRG.7847	MSTRG.7847	Ca22chr6A_C_albicans_SC5314	-	ATT	1031765-1031881	ATTGATTGTACAGTTATTCAAGTTTGCCATCCAGTTAATACATTCATTGAAATTAGCGATACACTCTTTCACTGGTGTAAATCTCAAGGGAACTATTCTATTACCGAGTGGTTCATT	IDCTVIQVCHPVNTFIEISDTLFHWCKSQGNYSITEWFI	39	117	264
MSTRG.7906	MSTRG.7906	Ca22chr6B_C_albicans_SC5314	+	ATT	157073-157174	ATTTATAAAGTTAACTACAATTACAACTTTTACATTCATTTACAAAATCATAGTATAACTGATTGTTTTCTTACCTTTAGGTATGTATATTATCCACATATT	IYKVNYNYNFYIHLQNHSITDCFLTFRYVYYPHI	34	102	293
MSTRG.7936	MSTRG.7936	Ca22chr6B_C_albicans_SC5314	-	ATT	217233-217310	ATTGAAGTTGAACTTATGTTTTTGAAAATTAGACGGAATTTGATTATTTTTAAGCTCTCGTGTATGTTCAGTATAGGT	IEVELMFLKIRRNLIIFKLSCMFSIG	26	78	233
MSTRG.8245	MSTRG.8245	Ca22chr7A_C_albicans_SC5314	-	AAG	111123-111251	AAGATTGTGGTGCTAGAAATTAAAATAAGCATCGTTTATGGACATGAGGTTGGTATATGGTTGTTTTTTGGTTGTTTTTTGCRGATATATTTGGGCCAAGATCAAAAAAATGAAGTATATGGTGATCTA	KIVVLEIKISIVYGHEVGIWLFFGCFLIYLGQDQKNEVYGDL	43	129	727
MSTRG.8305	MSTRG.8305	Ca22chr7A_C_albicans_SC5314	-	ATT	168943-169059	ATTAGGTTCGATAATGTTAAGAAATTTGAACCTGATTTATGTTATAGATTTAATACACATTTACACAGATATTTATATTTATATTTATATTTTGTAATCAATTATTATCAATGTAGA	IRFDNVKKFEPDLCYRFNTHLHRYLYLYLYFVINYYQCR	39	117	457
MSTRG.8309	MSTRG.8309	Ca22chr7A_C_albicans_SC5314	-	ATT	185131-185241	ATTTCATTTAAAAGTCGAGAGTGGTTCCTGAGTGTAAAAGGCGTTAACAGTATTAAAGCTTACTTATATATAGCAGAATACCTCAACCTGTGGTTCTACAGTCTTCTGTAT	ISFKSREWFLSVKGVNSIKAYLYIAEYLNLWFYSLLY	37	111	331
MSTRG.835	MSTRG.835	Ca22chr1A_C_albicans_SC5314	-	AAG	1966895-1966976,1967256-1967311	AAGAAGAAGAAGAAGACCAAAATAATATATAGAGAAATATCGTGTAATATATTTACAGAAAAAAAAAAAAAAATAAAAAGGTCGTTCCTGTACCAAATCCCACTAACTAATTTTAACCAATCAAATTTATTACTATAC	KKKKKTKIIYREISCNIFTEKKKKIKRSFLYQIPLTNFNQSNLLLY	46	138	123
MSTRG.835	MSTRG.835	Ca22chr1A_C_albicans_SC5314	-	AAG	1966895-1966976,1967256-1967311	AAGAAGAAGAAGAAGACCAAAATAATATATAGAGAAATATCGTGTAATATATTTACAGAAAAAAAAAAAAAAATAAAAAGGTCGTTCCTGTACCAAATCCCACTAACTAATTTTAACCAATCAAATTTATTACTATAC	KKKKKTKIIYREISCNIFTEKKKKIKRSFLYQIPLTNFNQSNLLLY	46	138	123
MSTRG.8766	MSTRG.8766	Ca22chrRA_C_albicans_SC5314	-	AGG	8000-8116	AGGGTACTTCTATTTGACAACTTCTGTCACATGTTATTGCTTGATTTGGCTTGTTCTAAAGTGTTTTTTTTTTACTGGAAATTGATTATTCAGGGGTTTGTAATTGACCATAAAATC	RVLLFDNFCHMLLLDLACSKVFFFYWKLIIQGFVIDHKI	39	117	754
MSTRG.8853	MSTRG.8853	Ca22chrRA_C_albicans_SC5314	-	TTG	204325-204420	TTGCGTTTACATCATTTGCAACCCATATTGTATTATGTGAAAGTTGTGATAGATATTTCCGTGGTTATTGCACTTATCCGCTATGATTTTGACGAA	LRLHHLQPILYYVKVVIDISVVIALIRYDFDE	32	96	218
MSTRG.9256	MSTRG.9256	Ca22chrRA_C_albicans_SC5314	+	ATA	1120808-1120993	ATATTTATTCTACAACTAGTTTACTTCTGTTTGGGACAATTGGTGATTGATTATAATTGGATACTCCTTTTTTTCGGGGAATCTAGGAATTATGTACATCCCCGGGAAAAACTGGTTGTCAAACATCTACAGATAACGTTAATTAGTCACATAAGGTTAACAGTAAAGCTGTGTTTAGTATTAGTA	IFILQLVYFCLGQLVIDYNWILLFFGESRNYVHPREKLVVKHLQITLISHIRLTVKLCLVLV	62	186	345
MSTRG.9377	MSTRG.9377	Ca22chrRA_C_albicans_SC5314	+	AAG	1423432-1423701	AAGGTATTAATTTATTTATGGGTTTGGTTTGGCTTGAACTATATTGATAACTATCATTCTGGAAACTTTTTTTTGAAAAAAAAATTGGAGATTTTTGATGATAATTTTGAGTTCTTTGTTCATTATGAGTTTTTTTTTTTTTTTTATATCTGGATATTTTTTCATTTTCATTTGCCCCCCCCCCCCTTCCTCCTCCCTTTCCCCTTTTTAATCCCTTTGGTTCTTGGATTTTATTTATTTATTAAAACCAATAATAAGAGAGTCTTATTA	KVLIYLWVWFGLNYIDNYHSGNFFLKKKLEIFDDNFEFFVHYEFFFFFYIWIFFHFHLPPPPFLLPFPFLIPLVLGFYLFIKTNNKRVLL	90	270	838
MSTRG.944	MSTRG.944	Ca22chr1A_C_albicans_SC5314	-	ATT	2252662-2252760	ATTCTTTTTAGAAGAGAAAGAAAAAATTCCCAAAAAAAGATTTCAATTAATTCCACGGGAACATTGATTACAACCACGTCAACAGTTTCCCTTTTATAT	ILFRRERKNSQKKISINSTGTLITTTSTVSLLY	33	99	285
MSTRG.9573	MSTRG.9573	Ca22chrRA_C_albicans_SC5314	+	ATT	1885035-1885262	ATTTGGGAGGGAATGGGGAAGGAAGAAGAAGAAAAAAGTGGTGGAAAGGAGAAGATTTTTTTTGGGAGAAAAAATTTTTTTTATACCACCGAGAAGTGTGAGAGGATACGATGGGTGCGACAGGGGGTAGAGCTGTTGACAACGTTATATGGGGGAGCTCGTAGGAGGCTTGTAGAAGGTTTTTATGAGGTTTCTGATATGGAGTTGTTGATAGGGGTTGGGTGGAAA	IWEGMGKEEEEKSGGKEKIFFGRKNFFYTTEKCERIRWVRQGVELLTTLYGGARRRLVEGFYEVSDMELLIGVGWK	76	228	547
MSTRG.9605	MSTRG.9605	Ca22chrRA_C_albicans_SC5314	-	AAG	2012305-2012505	AAGAAAGAAAGAGAGAAAGAAACAAAGAAAGAAACAAAGAAAAACAAAAAAACTTTACTCATATCTCACAATTATAACAAGTTGGATTTTACACTTATCATCATTCATCACATTTTATACGCCATTTTTTTTTTTTTGCATGTAATAAGATCAGCTTTGTATATGAGAATTTATTGGGGTGTAAACAAAAGGGTGAGTGAG	KKEREKETKKETKKNKKTLLISHNYNKLDFTLIIIHHILYAIFFFLHVIRSALYMRIYWGVNKRVSE	67	201	757
MSTRG.9626	MSTRG.9626	Ca22chrRA_C_albicans_SC5314	+	ATC	1999092-1999208	ATCTTTTGCGCATTGAATGTTTTTTTTTTTTTTTCTTCATATCAACTGCTACTTCTTGGTATATTTACTCATTATAAAGGAAAGATGTCAAAGAGACGTGAAATAAAAAAGTGGCAA	IFCALNVFFFFSSYQLLLLGIFTHYKGKMSKRREIKKWQ	39	117	436
MSTRG.9632	MSTRG.9632	Ca22chrRA_C_albicans_SC5314	+	CTG	2009609-2009821	CTGCTTGTATATATCCTATTTCACTCCTACCTATACCAAAAAAAGGTCAAAAAAAGAGTTCCTCAGCATGAACACAAACAATGCCGCCTAAATAATCCTCAATTATTTAGAAGCCTAGGTTATTGGGCAATACCTAGATTTTATATCAACATAATCTTTTCCCACAACGGTTATCACCAAGTGCAGCAGCAAAAAACATCAAAGTCTTTTATA	LLVYILFHSYLYQKKVKKRVPQHEHKQCRLNNPQLFRSLGYWAIPRFYINIIFSHNGYHQVQQQKTSKSFI	71	213	1101
MSTRG.9666	MSTRG.9666	Ca22chrRA_C_albicans_SC5314	+	AAG	2076588-2076758	AAGATTGTTACAATGTCTGACGGTCGCTATAAAGGAAGAAGATTCAATATTATAGATGAGCAGGACAAGGATGGAAAAACCTATATTAAGGTACGTTATATAGATGGCGAAGTTGCTGTTTTGGACAAAGCAAAGGTAAATTTAGGTGGTGAAAATACATCTAAGGGTTTT	KIVTMSDGRYKGRRFNIIDEQDKDGKTYIKVRYIDGEVAVLDKAKVNLGGENTSKGF	57	171	725
MSTRG.9668	MSTRG.9668	Ca22chrRA_C_albicans_SC5314	+	ATC	2083369-2083551	ATCAAAATGCCAGACGGAATCTACAATAACGAACCCTTTACTATTATCAAACGTGAAATCATGGGCGGAGTACCTTGCTACACTATTGAATATGAAAAAGGTGGATGCCAAACCCTTCAAGAAGAAACACTTGAACGTTATGCTCCAGGTGCAGTAAAAAAATTCATCAAGGCAAACAAGGTC	IKMPDGIYNNEPFTIIKREIMGGVPCYTIEYEKGGCQTLQEETLERYAPGAVKKFIKANKV	61	183	459
MSTRG.9669	MSTRG.9669	Ca22chrRA_C_albicans_SC5314	+	ATA	2085769-2085996	ATAGAAAACACAACAAGAAAAAAAGCAATGTGCTGTCCATGGTTTCCACCCTATTCCAATCGTGATATGTTTACTATTGTAGCTTGTCATGTTGTAAATGGGGTAGTTTATTATACCGTCCGTTATAAAAATGGTCAATATCAGATATTCCCAGAGTACACTGTGCTAATATATGCCCCAGACGAAGTTATGAGATATCATTTTAATAATGGTCTGGTGGATTATCAA	IENTTRKKAMCCPWFPPYSNRDMFTIVACHVVNGVVYYTVRYKNGQYQIFPEYTVLIYAPDEVMRYHFNNGLVDYQ	76	228	637
MSTRG.9734	MSTRG.9734	Ca22chrRA_C_albicans_SC5314	-	AAG	2240455-2240616	AAGGTAGGCATTAGTCTAACTGTTGTTAAAGATGGTACATGTATATCAAATGAGATCTATACACCATGTAAAACAGAAACCATGAATACGCTGGTACAAGATACAACCGAGGTGATAAGAAGGCGGGTTAGCAATGCTAGGTTATCTGTATTAGAGTATATG	KVGISLTVVKDGTCISNEIYTPCKTETMNTLVQDTTEVIRRRVSNARLSVLEYM	54	162	373
MSTRG.9895	MSTRG.9895	Ca22chrRB_C_albicans_SC5314	+	TTG	611090-611248	TTGGTCTACTTTTGCCGAATCAAATTGCCACGTCACCACTTTACTCGGTATTCTAACCTCTCTCTCTCTCTCTCTATATATATATATATAACCAGTAATATCCCCCCTATCCTATTCTATTTTATAAAATTTTTTTTTCTACATAGTTGTTTTTGCCAG	LVYFCRIKLPRHHFTRYSNLSLSLSIYIYITSNIPPILFYFIKFFFLHSCFCQ	53	159	473
MSTRG.9904	MSTRG.9904	Ca22chrRB_C_albicans_SC5314	-	ATT	624326-624394	ATTACATTGGCAGCGATTCTGATATCGCTTACTAACATACCAGAGATAGCAAGTCAACTCTTTAGAAGT	ITLAAILISLTNIPEIASQLFRS	23	69	231
